# Supplementary material for: Gaseous and soil OCPs and PCBs along the Indus River, Pakistan: spatial patterns and air–soil gradients
Source: Royal Society of Chemistry journal article supplement (doi:10.1039/d2em00363e), 2023-01-01
Supplement: d2em00363e1.pdf [file d2em00363e1.pdf]

1 **Gaseous and Soil OCPs and PCBs along the Indus River Pakistan: Spatial Pattern and Air-**  
2 **Soil Gradients**

3  
4 Muhammad Sohail <sup>a,b</sup>, Syed Ali Musstjab Akber Shah Eqani <sup>a\*\*</sup>, Shazia Ilyas<sup>c</sup>, Habib Bokhari <sup>d</sup>,  
5 Nadeem Ali <sup>e</sup>, Joel E Podgorski <sup>f</sup>, Shafi Muhammad <sup>a</sup>, Dave Adelman <sup>g</sup>, Rainer Lohmann <sup>g</sup>

6  
7 *a)- Department of Biosciences, COMSATS University Islamabad, Pakistan.*

8 *b)- Department of Zoology, University of Central Punjab, Sargodha Campus, Lahore Pakistan*

9 *c)- Department of Environmental Sciences, Forman Christian College (A Chartered University),*  
10 *Lahore, Pakistan*

11 *d)- Department of Microbiology, Kohsar University Murree, Punjab, Pakistan*

12 *e)- Centre of Excellence in Environmental Studies, King Abdulaziz University, Jeddah, Saudi*  
13 *Arabia*

14 *f)- Eawag, Swiss Federal Institute of Aquatic Science and Technology, CH-8600 Dübendorf,*  
15 *Switzerland;*

16 *g)- Graduate School of Oceanography, University of Rhode Island, 215 South Ferry Road,*  
17 *Narragansett, Rhode Island 02882, United States*

18

19 Corresponding authors:

20

21 Dr Syed Ali Musstjab Akber Shah Eqani (PhD),  
22 Associate Professor (Tenured),  
23 Public Health and Environment Lab,  
24 Department of Biosciences, COMSATS University Islamabad, Pakistan  
25 Mobile: 00921-331-5176512  
26 Email: [alishah@comsats.edu.pk](mailto:alishah@comsats.edu.pk)

27

28

29

30 Muhammad Sohail, PhD.  
31 Department of Zoology  
32 University of Central Punjab, Sargodha Campus, Lahore Pakistan  
33 Mobile # +92-333-5343854  
34 E-mail: [s4-sohail@ucp.edu.pk](mailto:s4-sohail@ucp.edu.pk), [sohailqai@gmail.com](mailto:sohailqai@gmail.com)

35

36

37

38

39

40

41

42

43

44

45

46

47

48

49 **Supporting Information**

50

51 **List of Text**

52 **Text S1.** Air circulation pattern and POPs occurrence trends along Indus River, Pakistan

53

54

55 **List of Tables**

56

57 **Table S1.** Worldwide comparison of DDTs and PCBs in the air ( $\text{pg}/\text{m}^3$ )

58 **Table S2.** The WHO<sub>2005</sub>-TEQs of dioxin-like PCBs ( $\text{pgTEQs}/\text{m}^3$ ) in air along the Indus River,  
59 Pakistan.

60 **Table S3.** Comparison of DDTs and PCBs in soil ( $\text{ng}/\text{g}$ ) from different parts of the world.

61 **Table S4.** The WHO<sub>2005</sub>-TEQ of dioxin-like PCBs ( $\text{pgTEQs}/\text{g}$ ) measured into soil and dust.

62 **Table S5.** Atmospheric circulation over the sampling sites and their % age contribution.

63

64 **List of Figures**

65

66 **Figure S1.** Diagnostic ratio of DDTs in air along Indus River, Pakistan.

67 **Figure S2.** Indicative diagnostic ratios for DDTs in the surface soil collected from the studied

68 sites along the Indus River, Pakistan

69 **Figure S3.** Wind trajectories of each studied sampling sites during June, 2013.

70

71

72

73 **Text S1. More detail on Air circulation pattern and POPs occurrence trends along Indus**  
74 **River, Pakistan**

75

76 Other sites like Islamabad (S-17), the capital city of Pakistan, is located in the lesser Himalayan  
77 areas, and high OCPs and PCBs contamination in these areas has been suggested to stem from  
78 local air circulation (64%), with a relatively minor influence of northwest winds from central Asia  
79 (36%). Similarly, Abbottabad (S-6) and Swabi (S-7) were mostly influenced by local-origin air  
80 masses (67% and 58%), which are mainly responsible for OCPs and PCBs mobilization into these  
81 regions. At the same time, northwestern air movement (~5 %) from the central Asia region and  
82 low-lying areas of Pakistan (~10%) may further aggravate the situation and contribute to the  
83 atmospheric POPs in these areas. Nowshera city (S-8) has been reported to possess the obsolete  
84 pesticides store and demolished DDT factory, which mainly contributed by local air mass (60%)  
85 towards high POPs burden in these areas. In comparison, 40% of air masses arrived from western  
86 parts of the country and across the border from Central Asia and Afghanistan. On the other hand,  
87 air masses entering into Indus riverine delta [(e.g., Mianwali (S-9), Bakkhar (S-10), and Layyah  
88 (S-11)] originated majorly from local sources (25%, 59%, and 55%) and also from northwestern  
89 directions of central Asia and Afghanistan (~40%) and contributed towards the gaseous OCPs and  
90 PCBs burden.

91 Furthermore, 33% of air masses that arrived in D.G khan (S-12) were associated with north  
92 westerlies from central Asia, 46% traveled from westerlies from regional areas of  
93 Baluchistan/Afghanistan, and the remaining 41% were dominated by winds of the Arabian Sea  
94 traveling across the coastal part of Pakistan. Areas in the South of Pakistan near to the coastal  
95 regional Sukkur (S-13) and Khairpur (S-14) are mainly influenced by local air masses originating  
96 from the Arabian Sea and coastal areas in the southwestern direction (~ 60%) as compared to the  
97 western and northwestern part of the country (i.e., <30%). Hyderabad City (S-15) is a gateway of  
98 Arabian Sea winds where 100% of air masses movement is either from south and southwest  
99 direction from Arabian coast. Sukkur area exceptionally showed the highest OCPs/PCBs  
100 contamination measurement and reflected the extensive input from ongoing local industrial and  
101 urban activities.

102

103

104

105

106

107 **Table S1.**

| <b>Sampling Location</b>           | <b>Sampling Year</b> | <b><math>\Sigma</math>DDTs</b> | <b><math>\Sigma</math>PCBs</b> | <b>References</b> |
|------------------------------------|----------------------|--------------------------------|--------------------------------|-------------------|
| Indus River Flood - Plain Pakistan | 2014                 | 0–413.20                       | 10.43–1108.89                  | Current Study     |
| Province Punjab, Pakistan          | 2011                 | 347–24                         |                                | (1)               |
| Province Punjab, Pakistan          | 2011                 |                                | 34–390                         | (1)               |
| Coastal Length of India            | 2006                 | 16–2952                        |                                | (2)               |
| Agricultural Region, India         | 2006, 2007           |                                | 12,100                         | (3)               |
| Urban, Rural, Background, China    | 2005                 |                                | 250                            | (2)               |
| Taihu Lake, China                  | 2004                 | <i>p,p'</i> -DDT (124)         |                                | (4)               |
| Mexico                             | 2005-2006            | 15.0–1975                      |                                | (5)               |
| Japan                              | 2008                 |                                | 184                            | (6)               |
| Southern USA                       | 2003                 | 0.06–26                        |                                | (7)               |

108

109

110

111

112

113

114 Table S2.

115

| TEQ (Dioxin Like PCBs)    | Studied Zone |          |          |          |      |          |          |          |          |          |          |          |          |
|---------------------------|--------------|----------|----------|----------|------|----------|----------|----------|----------|----------|----------|----------|----------|
|                           |              | FMZ      |          |          | WMZ  |          |          | ARZ      |          |          | LLZ      |          |          |
|                           | TEF          | Min      | Max      | mean     | m in | Max      | mean     | Min      | max      | mean     | min      | Max      | mean     |
| PCB-118                   | 0.0003       | 0        | 0.000103 | 3.58E-05 | 0    | 1.51E-05 | 3.77E-06 | 0        | 0.000101 | 3.06E-05 | 5.17E-05 | 0.00013  | 9.09E-05 |
| PCB-114                   | 0.0003       | 0        | 0.000137 | 5.19E-05 | 0    | 0        | 0        | 0        | 0.000283 | 7.39E-05 | 0        | 0.000235 | 0.000118 |
| PCB-105                   | 0.0003       | 0        | 0.000132 | 5.65E-05 | 0    | 4.17E-06 | 1.04E-06 | 0        | 0.000609 | 0.000162 | 2.79E-05 | 0.000336 | 0.000182 |
| PCB-156                   | 0.0003       | 0        | 6.32E-05 | 2E-05    | 0    | 0        | 0        | 0        | 0.000588 | 0.000147 | 0        | 5.27E-05 | 2.63E-05 |
| <b>Mono-ortho DL-PCBs</b> |              | 0.0000   | 0.0001   | 0.0000   | 0    | 0        | 0        | 0        | 0.000609 | 0.000103 | 0        | 0.000336 | 0.000104 |
| PCB-77                    | 0.0001       | 0        | 0.000061 | 0.000159 | 0    | 0        | 0        | 0        | 7.06E-06 | 1.77E-06 | 9.03E-05 | 0.000524 | 0.000307 |
| PCB-126                   | 0.1          | 0        | 0.537605 | 0.211659 | 0    | 0        | 0        | 0        | 2.871326 | 0.734383 | 0        | 1.341775 | 0.670888 |
| PCB-169                   | 0.03         | 0        | 0.316009 | 0.079002 | 0    | 0.010757 | 0.002689 | 0        | 1.334158 | 0.33354  | 0        | 0.137453 | 0.068726 |
| <b>Non-ortho DL-PCBs</b>  |              | 0        | 0.537605 | 0.09694  | 0    | 0.010757 | 0.000896 | 0        | 2.871326 | 0.355975 | 0        | 1.341775 | 0.24664  |
| DL-PCB                    |              | 0.000137 | 0.537646 | 0.09694  | 0    | 0.010757 | 0.000896 | 0.000609 | 2.871429 | 0.355975 | 0.000336 | 1.34188  | 0.24674  |

116

117

118 **Table S3.**

| <b>Sampling Location</b>              | <b><math>\Sigma</math>DDTs</b> | <b><math>\Sigma</math>PCBs</b> | <b>References</b> |
|---------------------------------------|--------------------------------|--------------------------------|-------------------|
| Surface soil- Indus River<br>Pakistan | 0–413.20                       | 10.43–1108.89                  | This study        |
| Soil of Province Punjab, Pakistan     | 347.24                         |                                | (1)               |
| Soil of Province Punjab, Pakistan     |                                | 34–390                         | (1)               |
| Dust fall along Indus River           | 7.17                           | 16.17                          | This study        |
| Indoor dust Pakistan                  | 46                             |                                | (8)               |
| Indoor dust Pakistan                  | 88.2                           | 0.75                           | (9)               |
| Soil Coastal Length of India          | 16–2952                        |                                | (2)               |
| Soil Agricultural Region, India       |                                | 12,100                         | (3)               |
| Soils, China                          |                                | 250                            | (2)               |
| Soil of Taihu Lake, China             | <i>p,p'</i> -DDT<br>(124)      |                                | (4)               |
| Soil of Mexico                        | 15.0 - 1975                    |                                | (10)              |
| Soil of Japan                         |                                | 184                            | (6)               |
| Soil of Southern USA                  | 0.06–26                        |                                | (7)               |
| Soil of Spain and UK                  | 6.0 - 83.0                     |                                | (11)              |
| House dust in Singapore               | 67                             | 5.4                            | (12)              |
| Lake Chaohu China                     | 14.97                          |                                | (13)              |
| Indoor Dust in Romania                | 1050                           | 26.25                          | (14)              |
| Guangzhou China outdoor dust          | 136.07                         | 40.53                          | (15)              |

119  
120

121 Table S4.

| Studied Zones                        |         |              |               |               |              |              |              |              |               |              |              |               |               |
|--------------------------------------|---------|--------------|---------------|---------------|--------------|--------------|--------------|--------------|---------------|--------------|--------------|---------------|---------------|
| Dioxin Like PCBs<br>pg TEQs/g (Soil) | TEF     | FMZ          |               |               | WMZ          |              |              | ARZ          |               |              | LLZ          |               |               |
|                                      |         | Min          | Max           | Mean          | Min          | Max          | Mean         | Min          | Max           | Mean         | Min          | Max           | Mean          |
| PCB-118                              | 0.00003 | 0.001        | 0.011         | 0.005         | 0.000        | 0.007        | 0.004        | 0.002        | 0.003         | 0.003        | 0.000        | 0.007         | 0.003         |
| PCB-114                              | 0.00003 | 0.000        | 0.010         | 0.002         | 0.000        | 0.001        | 0.000        | 0.000        | 0.002         | 0.001        | 0.000        | 0.004         | 0.001         |
| PCB-105                              | 0.00003 | 0.003        | 0.016         | 0.007         | 0.000        | 0.001        | 0.001        | 0.000        | 0.004         | 0.002        | 0.000        | 0.011         | 0.005         |
| PCB-156                              | 0.00003 | 0.000        | 0.009         | 0.004         | 0.000        | 0.000        | 0.000        | 0.000        | 0.002         | 0.001        | 0.000        | 0.005         | 0.003         |
| <b>∑Mono-ortho<br/>DL-PCBs</b>       |         | <b>0.005</b> | <b>0.042</b>  | <b>0.019</b>  | <b>0.001</b> | <b>0.007</b> | <b>0.004</b> | <b>0.002</b> | <b>0.009</b>  | <b>0.006</b> | <b>0.002</b> | <b>0.026</b>  | <b>0.012</b>  |
| PCB-77                               | 0.0001  | 0.000        | 0.024         | 0.005         | 0.000        | 0.001        | 0.000        | 0.000        | 0.003         | 0.001        | 0.000        | 0.001         | 0.001         |
| PCB-126                              | 0.1     | 6.720        | 139.417       | 33.421        | 0.000        | 1.455        | 0.978        | 0.000        | 12.682        | 6.054        | 6.430        | 24.778        | 12.877        |
| PCB-169                              | 0.03    | 0.443        | 13.331        | 4.979         | 0.000        | 0.600        | 0.150        | 0.000        | 0.246         | 0.061        | 0.000        | 8.642         | 2.998         |
| <b>Non-ortho DL-<br/>PCBs</b>        |         | <b>8.386</b> | <b>152.77</b> | <b>38.405</b> | <b>0.000</b> | <b>1.601</b> | <b>1.128</b> | <b>0.000</b> | <b>12.928</b> | <b>6.116</b> | <b>6.783</b> | <b>33.420</b> | <b>15.875</b> |

122

123

124

125 **Table S6.** Atmospheric circulation over the sampling sites and their % age contribution.

| Sites               | 1st air source                    | 2 <sup>nd</sup> air source | 3 <sup>rd</sup> air source | 4 <sup>th</sup> air source |
|---------------------|-----------------------------------|----------------------------|----------------------------|----------------------------|
| S-1 (Hunza)         | 75% Central Asia                  | 15% Local                  | 10% China                  |                            |
| S-2 (Gilgit)        | 76 Central Asia                   | 14% Local                  | 9% China                   |                            |
| S-3 (Skardu)        | 53% Local                         | 36% Central Asia           | 11% eastern side           |                            |
| S-4 (Swat)          | 22 % North direction Central Asia | 47% northwest part of Asia | 32% northwest part of Asia |                            |
| S-6<br>(Abbottabad) | 40% local                         | 27% local                  | 27% Central Asia           | 6% Regional                |
| S-7 (Swabi)         | 58% local                         | 42% Central Asia           |                            |                            |
| S-8 (Nowshera)      | 40% Central Asia                  | 32% Local                  | 28% local                  |                            |
| S-9 (Mianwali)      | 20% Central Asia                  | 31% Local                  | 23% Regional               | 25% Local Punjab           |
| S-10 (Bhakkar)      | 42% Central Asia                  | 59% Local Punjab           |                            |                            |
| S-11 (Layyah)       | 19% Central Asia                  | 26% Regional               | 55% local Near Karachi     |                            |
| S-12 (D.G Khan)     | 13% Central Asia                  | 46% Regional               | 41% Southwest Arabian Sea  |                            |
| S-13 (Sukkur)       | 31% Central Asia                  | 62% Southwest              | 8% South Arabian Sea       |                            |
| S-14 (Khairpur)     | 28% Central Asia                  | 63% SW Arabian Sea         | 8% South Arabian Sea       |                            |
| S-15<br>(Hyderabad) | 12% South Arabian Sea             | 67% SW Arabian Sea         | 22% Arabian Sea            |                            |
| S-17<br>(Islamabad) | 36% Central Asia                  | 64% Local                  |                            |                            |



127

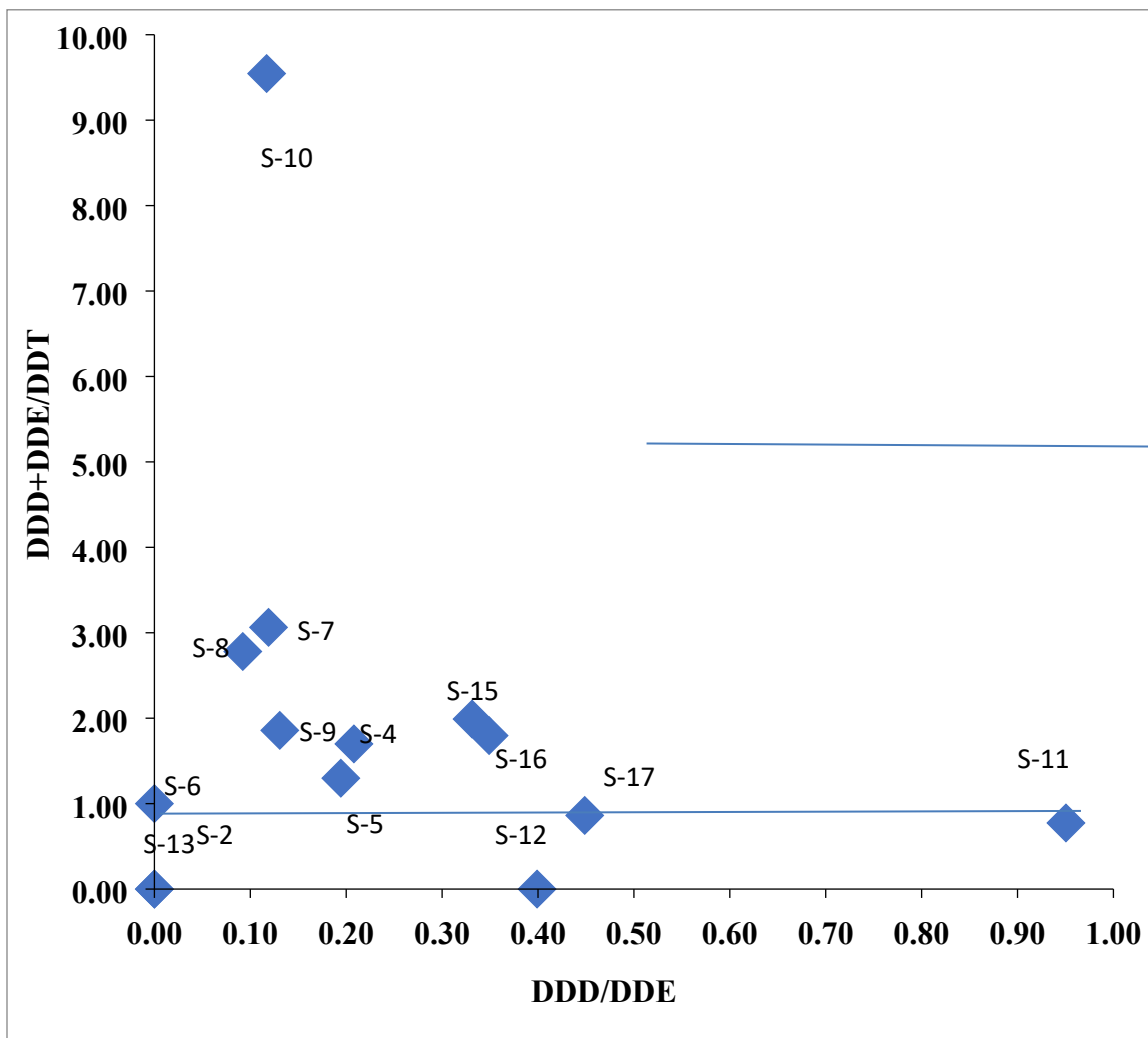

128

129

130

131 **Figure S1.**

132

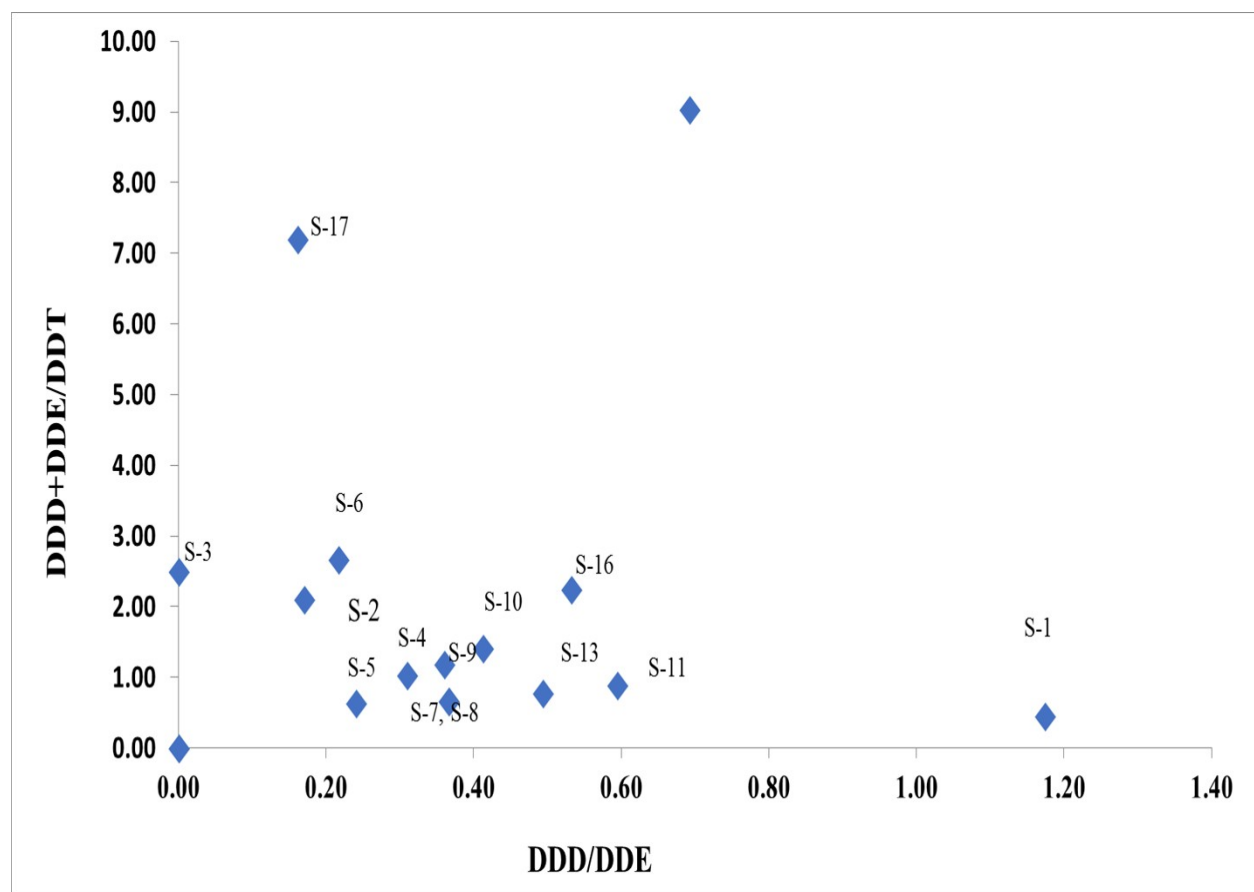

133

134

135

136

137 **Figure S2.**

138

139

140

141

142

143

144

145

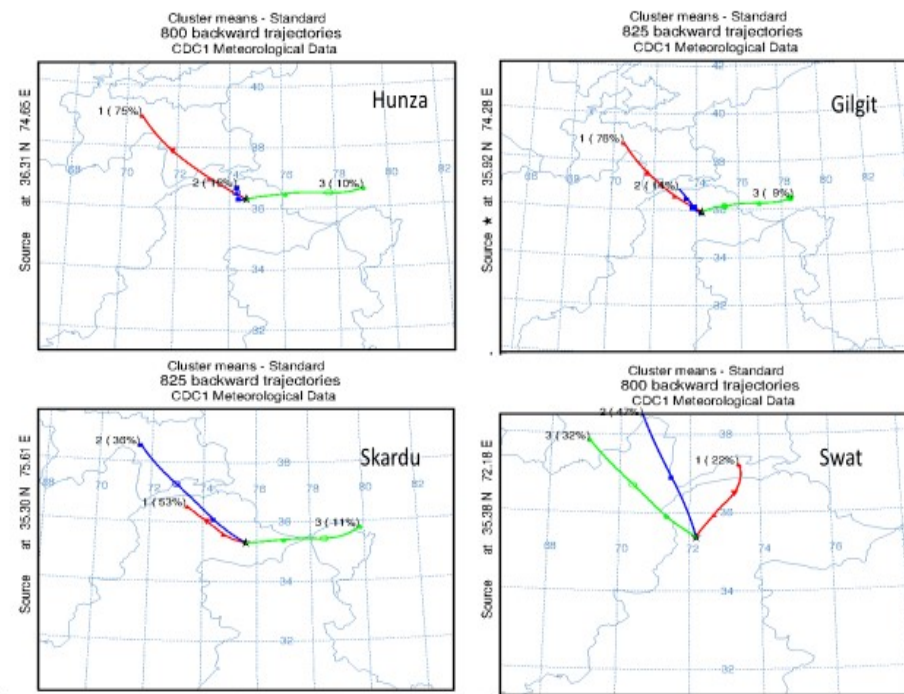

146

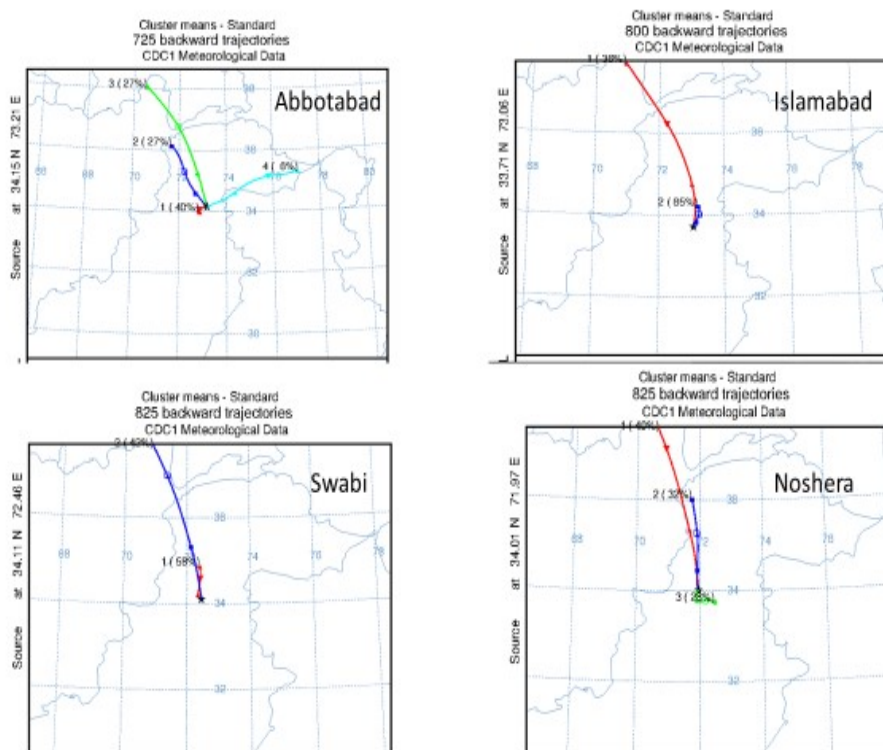

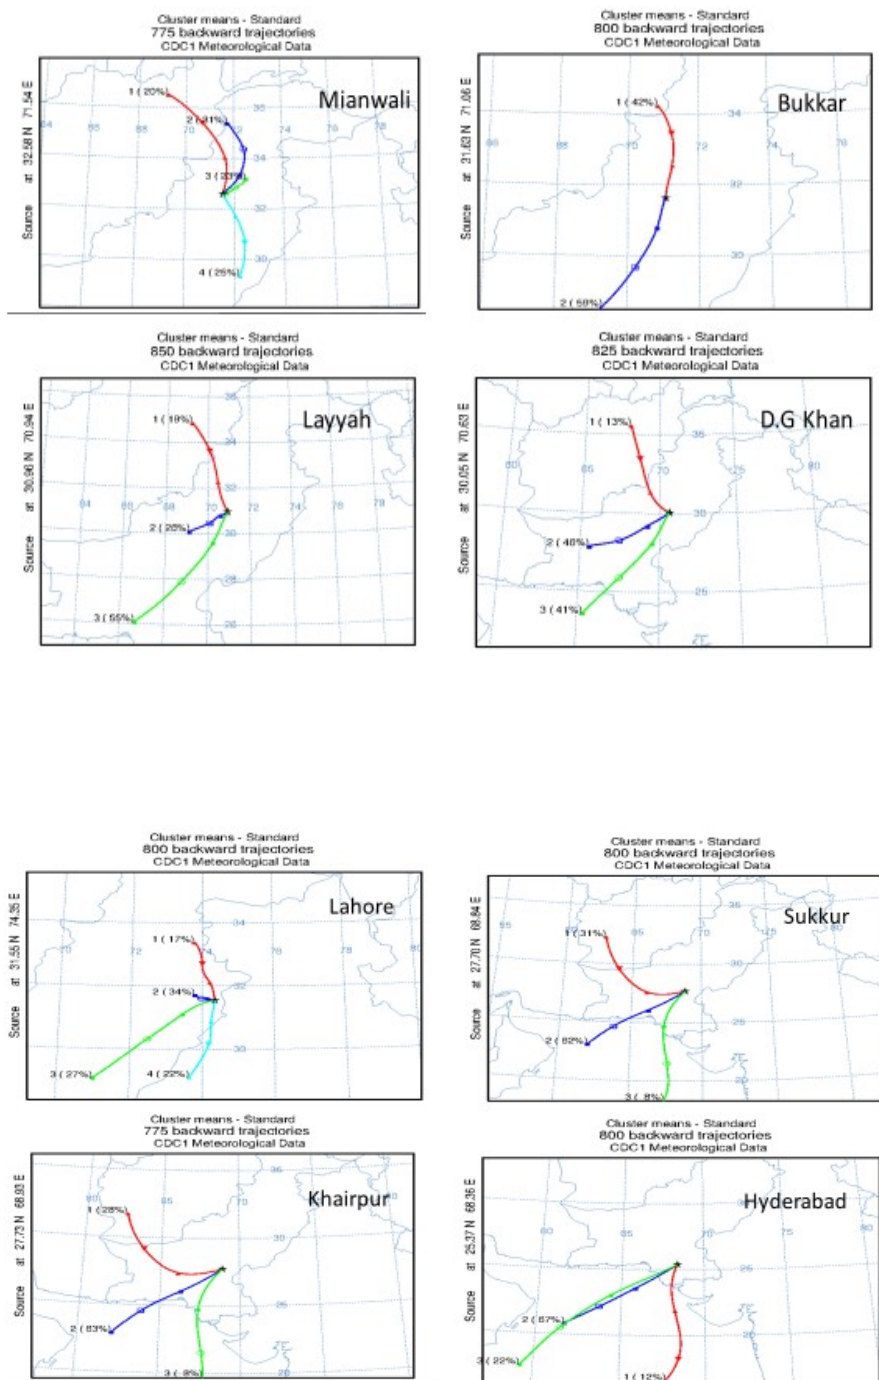

148 **Figure S3.**

149

150

151

152 **References:**

153

- 154 1. Syed JH, Malik RN, Liu D, Xu Y, Wang Y, Li J, et al. Organochlorine pesticides in air  
155 and soil and estimated air–soil exchange in Punjab, Pakistan. *Science of the total environment*.  
156 2013;444:491-7.
- 157 2. Zhang Z, Liu L, Li Y-F, Wang D, Jia H, Harner T, et al. Analysis of polychlorinated  
158 biphenyls in concurrently sampled Chinese air and surface soil. *Environmental science &*  
159 *technology*. 2008;42(17):6514-8.
- 160 3. Pozo K, Harner T, Lee SC, Sinha RK, Sengupta B, Loewen M, et al. Assessing seasonal  
161 and spatial trends of persistent organic pollutants (POPs) in Indian agricultural regions using  
162 PUF disk passive air samplers. *Environmental Pollution*. 2011;159(2):646-53.
- 163 4. Qiu X, Zhu T, Li J, Pan H, Li Q, Miao G, et al. Organochlorine pesticides in the air  
164 around the Taihu Lake, China. *Environmental Science & Technology*. 2004;38(5):1368-74.
- 165 5. Wong F, Alegria HA, Jantunen LM, Bidleman TF, Salvador-Figueroa M, Gold-Bouchot  
166 G, et al. Organochlorine pesticides in soils and air of southern Mexico: chemical profiles and  
167 potential for soil emissions. *Atmospheric environment*. 2008;42(33):7737-45.
- 168 6. Hogarh JN, Seike N, Kobara Y, Habib A, Nam J-J, Lee J-S, et al. Passive air monitoring  
169 of PCBs and PCNs across East Asia: a comprehensive congener evaluation for source  
170 characterization. *Chemosphere*. 2012;86(7):718-26.
- 171 7. Bidleman TF, Leone AD. Soil–air exchange of organochlorine pesticides in the Southern  
172 United States. *Environmental pollution*. 2004;128(1):49-57.
- 173 8. Ali N, Mehdi T, Malik RN, Eqani SA, Kamal A, Dirtu AC, et al. Levels and profile of  
174 several classes of organic contaminants in matched indoor dust and serum samples from  
175 occupational settings of Pakistan. *Environmental Pollution*. 2014;193:269-76.
- 176 9. Ali N, Harrad S, Goosey E, Neels H, Covaci A. “Novel” brominated flame retardants in  
177 Belgian and UK indoor dust: implications for human exposure. *Chemosphere*.  
178 2011;83(10):1360-5.
- 179 10. Wong F, Alegria HA, Bidleman TF. Organochlorine pesticides in soils of Mexico and the  
180 potential for soil–air exchange. *Environmental Pollution*. 2010;158(3):749-55.
- 181 11. Cabrerizo A, Dachs J, Jones KC, Barceló D. Soil-Air exchange controls on background  
182 atmospheric concentrations of organochlorine pesticides. *Atmospheric Chemistry and Physics*.  
183 2011;11(24):12799-811.
- 184 12. Tan J, Cheng SM, Loganath A, Chong YS, Obbard JP. Selected organochlorine pesticide  
185 and polychlorinated biphenyl residues in house dust in Singapore. *Chemosphere*.  
186 2007;68(9):1675-82.
- 187 13. Ouyang H-L, Wang Q-M, He W, Qin N, Kong X-Z, Liu W-X, et al. Organochlorine  
188 pesticides in the dust fall around Lake Chaohu, the fifth largest lake in China. *Environmental*  
189 *monitoring and assessment*. 2014;186(1):383-93.
- 190 14. Dirtu AC, Covaci A. Estimation of daily intake of organohalogenated contaminants from  
191 food consumption and indoor dust ingestion in Romania. *Environmental science & technology*.  
192 2010;44(16):6297-304.
- 193 15. Wang W, Huang M-J, Wu F-Y, Kang Y, Wang H-S, Cheung KC, et al. Risk assessment  
194 of bioaccessible organochlorine pesticides exposure via indoor and outdoor dust. *Atmospheric*  
195 *environment*. 2013;77:525-33.

196
